# Supplementary material for: Increased Association of Deamidated αA-N101D with Lens membrane of transgenic αAN101D vs. wild type αA mice: potential effects on intracellular ionic imbalance and membrane disorganization
Source: BMC Ophthalmol. 2020 Dec 10;20:484. doi: 10.1186/s12886-020-01734-0 (PMC7726915; doi:10.1186/s12886-020-01734-0)
Supplement: Supplementary file 1 — Additional file 1: Supplementary Table A. Water Insoluble-Urea Soluble (WI-US)-Protein Fraction of Alpha A-WT lenses. [file 12886_2020_1734_MOESM1_ESM.xlsx]

## Sheet: Om_1_ProteinSummary
N	%Cov(95)	Accession	Water Insoluble -Urea Soluble (WI-US)-Fraction of AlphaA-N101D lenses	Peptides(95%)		N	%Cov(95)	Accession	Water Insoluble-Urea Soluble (WI-US)-Protein Fraction of Alpha A-WT lenses	Peptides(95%)
15	25.6	sp|P60710|ACTB_MOUSE	Actin, cytoplasmic 1 OS=Mus musculus GN=Actb PE=1 SV=1	8		18	28.53	sp|P60710|ACTB_MOUSE	Actin, cytoplasmic 1 OS=Mus musculus GN=Actb PE=1 SV=1	9
15	25.6	sp|P63260|ACTG_MOUSE	Actin, cytoplasmic 2 OS=Mus musculus GN=Actg1 PE=1 SV=1	8		18	28.53	sp|P63260|ACTG_MOUSE	Actin, cytoplasmic 2 OS=Mus musculus GN=Actg1 PE=1 SV=1	9
1	86.73	sp|P24622|CRYAA_MOUSE	Alpha-crystallin A chain OS=Mus musculus GN=Cryaa PE=2 SV=1	152		1	95.41	sp|P24622|CRYAA_MOUSE	Alpha-crystallin A chain OS=Mus musculus GN=Cryaa PE=2 SV=1	196
2	93.71	sp|P23927|CRYAB_MOUSE	Alpha-crystallin B chain OS=Mus musculus GN=Cryab PE=1 SV=2	82		4	94.86	sp|P23927|CRYAB_MOUSE	Alpha-crystallin B chain OS=Mus musculus GN=Cryab PE=1 SV=2	112
47	2.765	sp|P17182|ENOA_MOUSE	Alpha-enolase OS=Mus musculus GN=Eno1 PE=1 SV=3	1		8	78.28	sp|P02525|CRBA1_MOUSE	Beta-crystallin A1 OS=Mus musculus GN=Cryba1 PE=2 SV=2	52
27	7.75	sp|P56480|ATPB_MOUSE	ATP synthase subunit beta, mitochondrial OS=Mus musculus GN=Atp5b PE=1 SV=2	3		15	59.9	sp|Q9JJV1|CRBA2_MOUSE	Beta-crystallin A2 OS=Mus musculus GN=Cryba2 PE=2 SV=3	21
12	58.08	sp|P02525|CRBA1_MOUSE	Beta-crystallin A1 OS=Mus musculus GN=Cryba1 PE=2 SV=2	25		10	90.82	sp|Q9JJV0|CRBA4_MOUSE	Beta-crystallin A4 OS=Mus musculus GN=Cryba4 PE=2 SV=3	37
14	37.06	sp|Q9JJV1|CRBA2_MOUSE	Beta-crystallin A2 OS=Mus musculus GN=Cryba2 PE=2 SV=3	14		5	90.8	sp|Q9WVJ5|CRBB1_MOUSE	Beta-crystallin B1 OS=Mus musculus GN=Crybb1 PE=1 SV=3	56
7	74.49	sp|Q9JJV0|CRBA4_MOUSE	Beta-crystallin A4 OS=Mus musculus GN=Cryba4 PE=2 SV=3	29		6	96.1	sp|P62696|CRBB2_MOUSE	Beta-crystallin B2 OS=Mus musculus GN=Crybb2 PE=1 SV=2	78
6	80	sp|Q9WVJ5|CRBB1_MOUSE	Beta-crystallin B1 OS=Mus musculus GN=Crybb1 PE=1 SV=3	38		2	90.52	sp|Q9JJU9|CRBB3_MOUSE	Beta-crystallin B3 OS=Mus musculus GN=Crybb3 PE=2 SV=3	105
5	82.44	sp|P62696|CRBB2_MOUSE	Beta-crystallin B2 OS=Mus musculus GN=Crybb2 PE=1 SV=2	73		13	88.2	sp|O35486|CRBS_MOUSE	Beta-crystallin S OS=Mus musculus GN=Crygs PE=1 SV=3	27
3	87.68	sp|Q9JJU9|CRBB3_MOUSE	Beta-crystallin B3 OS=Mus musculus GN=Crybb3 PE=2 SV=3	70		30	7.792	sp|P10126|EF1A1_MOUSE	Elongation factor 1-alpha 1 OS=Mus musculus GN=Eef1a1 PE=1 SV=3	3
13	71.91	sp|O35486|CRBS_MOUSE	Beta-crystallin S OS=Mus musculus GN=Crygs PE=1 SV=3	23		30	4.536	sp|P62631|EF1A2_MOUSE	Elongation factor 1-alpha 2 OS=Mus musculus GN=Eef1a2 PE=1 SV=1	2
34	2.597	sp|P10126|EF1A1_MOUSE	Elongation factor 1-alpha 1 OS=Mus musculus GN=Eef1a1 PE=1 SV=3	1		47	2.463	sp|P60843|IF4A1_MOUSE	Eukaryotic initiation factor 4A-I OS=Mus musculus GN=Eif4a1 PE=1 SV=1	1
34	2.592	sp|P62631|EF1A2_MOUSE	Elongation factor 1-alpha 2 OS=Mus musculus GN=Eef1a2 PE=1 SV=1	1		47	2.457	sp|P10630|IF4A2_MOUSE	Eukaryotic initiation factor 4A-II OS=Mus musculus GN=Eif4a2 PE=2 SV=2	1
41	2.463	sp|P60843|IF4A1_MOUSE	Eukaryotic initiation factor 4A-I OS=Mus musculus GN=Eif4a1 PE=1 SV=1	1		49	1.536	sp|P26040|EZRI_MOUSE	Ezrin OS=Mus musculus GN=Ezr PE=1 SV=3	1
41	2.457	sp|P10630|IF4A2_MOUSE	Eukaryotic initiation factor 4A-II OS=Mus musculus GN=Eif4a2 PE=2 SV=2	1		17	54.07	sp|Q05816|FABP5_MOUSE	Fatty acid-binding protein, epidermal OS=Mus musculus GN=Fabp5 PE=1 SV=3	15
16	39.26	sp|Q05816|FABP5_MOUSE	Fatty acid-binding protein, epidermal OS=Mus musculus GN=Fabp5 PE=1 SV=3	9		7	40.66	sp|A2AMT1|BFSP1_MOUSE	Filensin OS=Mus musculus GN=Bfsp1 PE=2 SV=1	35
8	35.58	sp|A2AMT1|BFSP1_MOUSE	Filensin OS=Mus musculus GN=Bfsp1 PE=2 SV=1	34		14	91.95	sp|P04345|CRGA_MOUSE	Gamma-crystallin A OS=Mus musculus GN=Cryga PE=2 SV=2	44
21	70.11	sp|P04345|CRGA_MOUSE	Gamma-crystallin A OS=Mus musculus GN=Cryga PE=2 SV=2	23		21	78.29	sp|P04344|CRGB_MOUSE	Gamma-crystallin B OS=Mus musculus GN=Crygb PE=2 SV=4	55
22	75.43	sp|P04344|CRGB_MOUSE	Gamma-crystallin B OS=Mus musculus GN=Crygb PE=2 SV=4	38		11	87.93	sp|Q61597|CRGC_MOUSE	Gamma-crystallin C OS=Mus musculus GN=Crygc PE=1 SV=3	56
10	86.78	sp|Q61597|CRGC_MOUSE	Gamma-crystallin C OS=Mus musculus GN=Crygc PE=1 SV=3	33		29	76.44	sp|P04342|CRGD_MOUSE	Gamma-crystallin D OS=Mus musculus GN=Crygd PE=2 SV=3	39
24	72.99	sp|P04342|CRGD_MOUSE	Gamma-crystallin D OS=Mus musculus GN=Crygd PE=2 SV=3	33		9	77.59	sp|Q03740|CRGE_MOUSE	Gamma-crystallin E OS=Mus musculus GN=Cryge PE=2 SV=4	47
49	74.14	sp|Q03740|CRGE_MOUSE	Gamma-crystallin E OS=Mus musculus GN=Cryge PE=2 SV=4	37		36	75.29	sp|Q9CXV3|CRGF_MOUSE	Gamma-crystallin F OS=Mus musculus GN=Crygf PE=2 SV=3	44
9	71.84	sp|Q9CXV3|CRGF_MOUSE	Gamma-crystallin F OS=Mus musculus GN=Crygf PE=2 SV=3	34		43	14.21	sp|Q8VHL5|CRGN_MOUSE	Gamma-crystallin N OS=Mus musculus GN=Crygn PE=1 SV=2	2
31	2.558	sp|P03995|GFAP_MOUSE	Glial fibrillary acidic protein OS=Mus musculus GN=Gfap PE=1 SV=4	1		38	2.558	sp|P03995|GFAP_MOUSE	Glial fibrillary acidic protein OS=Mus musculus GN=Gfap PE=1 SV=4	1
17	22.52	sp|P16858|G3P_MOUSE	Glyceraldehyde-3-phosphate dehydrogenase OS=Mus musculus GN=Gapdh PE=1 SV=2	6		22	22.52	sp|P16858|G3P_MOUSE	Glyceraldehyde-3-phosphate dehydrogenase OS=Mus musculus GN=Gapdh PE=1 SV=2	6
20	21.53	sp|Q9D1U0|GRIFN_MOUSE	Grifin OS=Mus musculus GN=Grifin PE=2 SV=1	5		23	16.67	sp|Q9D1U0|GRIFN_MOUSE	Grifin OS=Mus musculus GN=Grifin PE=2 SV=1	4
45	1.858	sp|P63017|HSP7C_MOUSE	Heat shock cognate 71 kDa protein OS=Mus musculus GN=Hspa8 PE=1 SV=1	1		46	1.858	sp|P63017|HSP7C_MOUSE	Heat shock cognate 71 kDa protein OS=Mus musculus GN=Hspa8 PE=1 SV=1	1
23	17.22	sp|P14602|HSPB1_MOUSE	Heat shock protein beta-1 OS=Mus musculus GN=Hspb1 PE=1 SV=3	4		24	17.22	sp|P14602|HSPB1_MOUSE	Heat shock protein beta-1 OS=Mus musculus GN=Hspb1 PE=1 SV=3	4
44	0.955	sp|P07901|HS90A_MOUSE	Heat shock protein HSP 90-alpha OS=Mus musculus GN=Hsp90aa1 PE=1 SV=4	1		33	2.901	sp|P11499|HS90B_MOUSE	Heat shock protein HSP 90-beta OS=Mus musculus GN=Hsp90ab1 PE=1 SV=3	2
46	0.9669	sp|P11499|HS90B_MOUSE	Heat shock protein HSP 90-beta OS=Mus musculus GN=Hsp90ab1 PE=1 SV=3	1		50	6.923	sp|P22752|H2A1_MOUSE	Histone H2A type 1 OS=Mus musculus GN=Hist1h2ab PE=1 SV=3	1
40	4.225	sp|P43275|H11_MOUSE	Histone H1.1 OS=Mus musculus GN=Hist1h1a PE=1 SV=2	1		50	6.923	sp|Q8CGP5|H2A1F_MOUSE	Histone H2A type 1-F OS=Mus musculus GN=Hist1h2af PE=1 SV=3	1
40	4.245	sp|P15864|H12_MOUSE	Histone H1.2 OS=Mus musculus GN=Hist1h1c PE=1 SV=2	1		50	7.031	sp|Q8CGP6|H2A1H_MOUSE	Histone H2A type 1-H OS=Mus musculus GN=Hist1h2ah PE=1 SV=3	1
40	4.072	sp|P43277|H13_MOUSE	Histone H1.3 OS=Mus musculus GN=Hist1h1d PE=1 SV=2	1		50	6.923	sp|Q8CGP7|H2A1K_MOUSE	Histone H2A type 1-K OS=Mus musculus GN=Hist1h2ak PE=1 SV=3	1
40	4.11	sp|P43274|H14_MOUSE	Histone H1.4 OS=Mus musculus GN=Hist1h1e PE=1 SV=2	1		50	6.923	sp|Q6GSS7|H2A2A_MOUSE	Histone H2A type 2-A OS=Mus musculus GN=Hist2h2aa1 PE=1 SV=3	1
25	26.92	sp|P22752|H2A1_MOUSE	Histone H2A type 1 OS=Mus musculus GN=Hist1h2ab PE=1 SV=3	5		50	6.923	sp|Q64522|H2A2B_MOUSE	Histone H2A type 2-B OS=Mus musculus GN=Hist2h2ab PE=1 SV=3	1
25	26.92	sp|Q8CGP5|H2A1F_MOUSE	Histone H2A type 1-F OS=Mus musculus GN=Hist1h2af PE=1 SV=3	5		50	6.977	sp|Q64523|H2A2C_MOUSE	Histone H2A type 2-C OS=Mus musculus GN=Hist2h2ac PE=1 SV=3	1
25	27.34	sp|Q8CGP6|H2A1H_MOUSE	Histone H2A type 1-H OS=Mus musculus GN=Hist1h2ah PE=1 SV=3	5		50	6.923	sp|Q8BFU2|H2A3_MOUSE	Histone H2A type 3 OS=Mus musculus GN=Hist3h2a PE=1 SV=3	1
25	26.92	sp|Q8CGP7|H2A1K_MOUSE	Histone H2A type 1-K OS=Mus musculus GN=Hist1h2ak PE=1 SV=3	5		50	6.977	sp|Q8R1M2|H2AJ_MOUSE	Histone H2A.J OS=Mus musculus GN=H2afj PE=1 SV=1	1
25	26.92	sp|Q6GSS7|H2A2A_MOUSE	Histone H2A type 2-A OS=Mus musculus GN=Hist2h2aa1 PE=1 SV=3	5		50	7.031	sp|Q3THW5|H2AV_MOUSE	Histone H2A.V OS=Mus musculus GN=H2afv PE=1 SV=3	1
25	21.54	sp|Q64522|H2A2B_MOUSE	Histone H2A type 2-B OS=Mus musculus GN=Hist2h2ab PE=1 SV=3	4		50	7.031	sp|P0C0S6|H2AZ_MOUSE	Histone H2A.Z OS=Mus musculus GN=H2afz PE=1 SV=2	1
25	27.13	sp|Q64523|H2A2C_MOUSE	Histone H2A type 2-C OS=Mus musculus GN=Hist2h2ac PE=1 SV=3	5		50	6.294	sp|P27661|H2AX_MOUSE	Histone H2AX OS=Mus musculus GN=H2afx PE=1 SV=2	1
25	26.92	sp|Q8BFU2|H2A3_MOUSE	Histone H2A type 3 OS=Mus musculus GN=Hist3h2a PE=1 SV=3	5		26	12.98	sp|P02535|K1C10_MOUSE	Keratin, type I cytoskeletal 10 OS=Mus musculus GN=Krt10 PE=1 SV=3	8
25	27.13	sp|Q8R1M2|H2AJ_MOUSE	Histone H2A.J OS=Mus musculus GN=H2afj PE=1 SV=1	5		19	7.522	sp|Q61414|K1C15_MOUSE	Keratin, type I cytoskeletal 15 OS=Mus musculus GN=Krt15 PE=1 SV=2	5
25	24.48	sp|P27661|H2AX_MOUSE	Histone H2AX OS=Mus musculus GN=H2afx PE=1 SV=2	5		19	5.774	sp|Q9QWL7|K1C17_MOUSE	Keratin, type I cytoskeletal 17 OS=Mus musculus GN=Krt17 PE=1 SV=3	4
18	33.07	sp|P70696|H2B1A_MOUSE	Histone H2B type 1-A OS=Mus musculus GN=Hist1h2ba PE=1 SV=3	8		19	6.203	sp|P19001|K1C19_MOUSE	Keratin, type I cytoskeletal 19 OS=Mus musculus GN=Krt19 PE=1 SV=1	4
18	33.33	sp|Q64475|H2B1B_MOUSE	Histone H2B type 1-B OS=Mus musculus GN=Hist1h2bb PE=1 SV=3	8		31	8.628	sp|Q6IFX2|K1C42_MOUSE	Keratin, type I cytoskeletal 42 OS=Mus musculus GN=Krt42 PE=1 SV=1	4
18	33.33	sp|Q6ZWY9|H2B1C_MOUSE	Histone H2B type 1-C/E/G OS=Mus musculus GN=Hist1h2bc PE=1 SV=3	8		38	2.17	sp|Q9Z2T6|KRT85_MOUSE	Keratin, type II cuticular Hb5 OS=Mus musculus GN=Krt85 PE=2 SV=2	1
18	33.33	sp|P10853|H2B1F_MOUSE	Histone H2B type 1-F/J/L OS=Mus musculus GN=Hist1h2bf PE=1 SV=2	8		34	9.419	sp|P04104|K2C1_MOUSE	Keratin, type II cytoskeletal 1 OS=Mus musculus GN=Krt1 PE=1 SV=4	12
18	33.33	sp|Q64478|H2B1H_MOUSE	Histone H2B type 1-H OS=Mus musculus GN=Hist1h2bh PE=1 SV=3	8		25	7.692	sp|Q6IFZ6|K2C1B_MOUSE	Keratin, type II cytoskeletal 1b OS=Mus musculus GN=Krt77 PE=1 SV=1	5
18	33.33	sp|Q8CGP1|H2B1K_MOUSE	Histone H2B type 1-K OS=Mus musculus GN=Hist1h2bk PE=1 SV=3	8		37	3.535	sp|Q3UV17|K22O_MOUSE	Keratin, type II cytoskeletal 2 oral OS=Mus musculus GN=Krt76 PE=2 SV=1	4
18	33.33	sp|P10854|H2B1M_MOUSE	Histone H2B type 1-M OS=Mus musculus GN=Hist1h2bm PE=1 SV=2	8		20	7.586	sp|Q922U2|K2C5_MOUSE	Keratin, type II cytoskeletal 5 OS=Mus musculus GN=Krt5 PE=1 SV=1	7
18	33.33	sp|Q8CGP2|H2B1P_MOUSE	Histone H2B type 1-P OS=Mus musculus GN=Hist1h2bp PE=1 SV=3	8		35	12.12	sp|P50446|K2C6A_MOUSE	Keratin, type II cytoskeletal 6A OS=Mus musculus GN=Krt6a PE=1 SV=3	10
18	33.33	sp|Q64525|H2B2B_MOUSE	Histone H2B type 2-B OS=Mus musculus GN=Hist2h2bb PE=1 SV=3	8		38	2.407	sp|Q9DCV7|K2C7_MOUSE	Keratin, type II cytoskeletal 7 OS=Mus musculus GN=Krt7 PE=1 SV=1	1
18	27.78	sp|Q64524|H2B2E_MOUSE	Histone H2B type 2-E OS=Mus musculus GN=Hist2h2be PE=1 SV=3	7		38	6.865	sp|Q6NXH9|K2C73_MOUSE	Keratin, type II cytoskeletal 73 OS=Mus musculus GN=Krt73 PE=1 SV=1	3
18	27.78	sp|Q9D2U9|H2B3A_MOUSE	Histone H2B type 3-A OS=Mus musculus GN=Hist3h2ba PE=1 SV=3	7		44	1.954	sp|Q8CIX8|LGSN_MOUSE	Lengsin OS=Mus musculus GN=Lgsn PE=1 SV=1	1
18	27.78	sp|Q8CGP0|H2B3B_MOUSE	Histone H2B type 3-B OS=Mus musculus GN=Hist3h2bb PE=1 SV=3	7		39	3.422	sp|P51180|MIP_MOUSE	Lens fiber major intrinsic protein OS=Mus musculus GN=Mip PE=1 SV=2	1
26	28.68	sp|P68433|H31_MOUSE	Histone H3.1 OS=Mus musculus GN=Hist1h3a PE=1 SV=2	7		49	1.56	sp|P26041|MOES_MOUSE	Moesin OS=Mus musculus GN=Msn PE=1 SV=3	1
26	28.68	sp|P84228|H32_MOUSE	Histone H3.2 OS=Mus musculus GN=Hist1h3b PE=1 SV=2	7		51	1.379	sp|Q8C3P7|MTA70_MOUSE	N6-adenosine-methyltransferase subunit METTL3 OS=Mus musculus GN=Mettl3 PE=1 SV=2	1
26	28.68	sp|P84244|H33_MOUSE	Histone H3.3 OS=Mus musculus GN=H3f3a PE=1 SV=2	7		41	9.548	sp|P35700|PRDX1_MOUSE	Peroxiredoxin-1 OS=Mus musculus GN=Prdx1 PE=1 SV=1	2
26	28.68	sp|P02301|H3C_MOUSE	Histone H3.3C OS=Mus musculus GN=H3f3c PE=3 SV=3	7		3	67.79	sp|Q6NVD9|BFSP2_MOUSE	Phakinin OS=Mus musculus GN=Bfsp2 PE=1 SV=1	36
30	29.13	sp|P62806|H4_MOUSE	Histone H4 OS=Mus musculus GN=Hist1h4a PE=1 SV=2	3		32	3.955	sp|P52480|KPYM_MOUSE	Supplemental Table I	2
33	3.684	sp|P02535|K1C10_MOUSE	Keratin, type I cytoskeletal 10 OS=Mus musculus GN=Krt10 PE=1 SV=3	2		49	1.544	sp|P26043|RADI_MOUSE	Radixin OS=Mus musculus GN=Rdx PE=1 SV=3	1
35	1.86	sp|Q61781|K1C14_MOUSE	Keratin, type I cytoskeletal 14 OS=Mus musculus GN=Krt14 PE=1 SV=2	1		40	2.794	sp|P24549|AL1A1_MOUSE	Retinal dehydrogenase 1 OS=Mus musculus GN=Aldh1a1 PE=1 SV=5	1
35	3.54	sp|Q61414|K1C15_MOUSE	Keratin, type I cytoskeletal 15 OS=Mus musculus GN=Krt15 PE=1 SV=2	2		48	0.3821	RRRRRsp|B1AY13|UBP24_MOUSE	REVERSED Ubiquitin carboxyl-terminal hydrolase 24 OS=Mus musculus GN=Usp24 PE=1 SV=1	1
35	3.695	sp|Q9QWL7|K1C17_MOUSE	Keratin, type I cytoskeletal 17 OS=Mus musculus GN=Krt17 PE=1 SV=3	2		16	3.56	sp|P16546|SPTN1_MOUSE	Spectrin alpha chain, non-erythrocytic 1 OS=Mus musculus GN=Sptan1 PE=1 SV=4	8
35	3.97	sp|P19001|K1C19_MOUSE	Keratin, type I cytoskeletal 19 OS=Mus musculus GN=Krt19 PE=1 SV=1	2		45	0.7617	sp|Q62261|SPTB2_MOUSE	Spectrin beta chain, non-erythrocytic 1 OS=Mus musculus GN=Sptbn1 PE=1 SV=2	2
35	1.991	sp|Q6IFX2|K1C42_MOUSE	Keratin, type I cytoskeletal 42 OS=Mus musculus GN=Krt42 PE=1 SV=1	1		28	9.978	sp|P68369|TBA1A_MOUSE	Tubulin alpha-1A chain OS=Mus musculus GN=Tuba1a PE=1 SV=1	3
31	2.17	sp|Q9Z2T6|KRT85_MOUSE	Keratin, type II cuticular Hb5 OS=Mus musculus GN=Krt85 PE=2 SV=2	1		28	3.111	sp|P05214|TBA3_MOUSE	Tubulin alpha-3 chain OS=Mus musculus GN=Tuba3a PE=1 SV=1	1
28	5.338	sp|P04104|K2C1_MOUSE	Keratin, type II cytoskeletal 1 OS=Mus musculus GN=Krt1 PE=1 SV=4	3		27	7.416	sp|Q7TMM9|TBB2A_MOUSE	Tubulin beta-2A chain OS=Mus musculus GN=Tubb2a PE=1 SV=1	3
42	5.944	sp|Q6IFZ6|K2C1B_MOUSE	Keratin, type II cytoskeletal 1b OS=Mus musculus GN=Krt77 PE=1 SV=1	3		27	7.416	sp|Q9CWF2|TBB2B_MOUSE	Tubulin beta-2B chain OS=Mus musculus GN=Tubb2b PE=1 SV=1	3
36	1.515	sp|Q3UV17|K22O_MOUSE	Keratin, type II cytoskeletal 2 oral OS=Mus musculus GN=Krt76 PE=2 SV=1	1		27	7.432	sp|Q9D6F9|TBB4A_MOUSE	Tubulin beta-4A chain OS=Mus musculus GN=Tubb4a PE=1 SV=3	3
32	2.069	sp|Q922U2|K2C5_MOUSE	Keratin, type II cytoskeletal 5 OS=Mus musculus GN=Krt5 PE=1 SV=1	1		27	7.416	sp|P68372|TBB4B_MOUSE	Tubulin beta-4B chain OS=Mus musculus GN=Tubb4b PE=1 SV=1	3
32	2.17	sp|P50446|K2C6A_MOUSE	Keratin, type II cytoskeletal 6A OS=Mus musculus GN=Krt6a PE=1 SV=3	1		27	7.432	sp|P99024|TBB5_MOUSE	Tubulin beta-5 chain OS=Mus musculus GN=Tubb5 PE=1 SV=1	3
32	2.135	sp|Q9Z331|K2C6B_MOUSE	Keratin, type II cytoskeletal 6B OS=Mus musculus GN=Krt6b PE=1 SV=3	1		42	3.587	sp|Q9R0P9|UCHL1_MOUSE	Ubiquitin carboxyl-terminal hydrolase isozyme L1 OS=Mus musculus GN=Uchl1 PE=1 SV=1	1
31	2.407	sp|Q9DCV7|K2C7_MOUSE	Keratin, type II cytoskeletal 7 OS=Mus musculus GN=Krt7 PE=1 SV=1	1		12	27.04	sp|P20152|VIME_MOUSE	Vimentin OS=Mus musculus GN=Vim PE=1 SV=3	16
31	4.267	sp|Q6NXH9|K2C73_MOUSE	Keratin, type II cytoskeletal 73 OS=Mus musculus GN=Krt73 PE=1 SV=1	2
32	2.178	sp|Q8BGZ7|K2C75_MOUSE	Keratin, type II cytoskeletal 75 OS=Mus musculus GN=Krt75 PE=1 SV=1	1
39	2.26	sp|Q8VED5|K2C79_MOUSE	Keratin, type II cytoskeletal 79 OS=Mus musculus GN=Krt79 PE=2 SV=2	1
48	3.422	sp|P51180|MIP_MOUSE	Lens fiber major intrinsic protein OS=Mus musculus GN=Mip PE=1 SV=2	1
38	9.548	sp|P35700|PRDX1_MOUSE	Peroxiredoxin-1 OS=Mus musculus GN=Prdx1 PE=1 SV=1	2
4	73.8	sp|Q6NVD9|BFSP2_MOUSE	Phakinin OS=Mus musculus GN=Bfsp2 PE=1 SV=1	35
43	0.3821	RRRRRsp|B1AY13|UBP24_MOUSE	REVERSED Ubiquitin carboxyl-terminal hydrolase 24 OS=Mus musculus GN=Usp24 PE=1 SV=1	1
19	2.629	sp|P16546|SPTN1_MOUSE	Spectrin alpha chain, non-erythrocytic 1 OS=Mus musculus GN=Sptan1 PE=1 SV=4	5
29	3.146	sp|Q7TMM9|TBB2A_MOUSE	Tubulin beta-2A chain OS=Mus musculus GN=Tubb2a PE=1 SV=1	1
29	3.146	sp|Q9CWF2|TBB2B_MOUSE	Tubulin beta-2B chain OS=Mus musculus GN=Tubb2b PE=1 SV=1	1
29	5.18	sp|Q9D6F9|TBB4A_MOUSE	Tubulin beta-4A chain OS=Mus musculus GN=Tubb4a PE=1 SV=3	2
29	5.169	sp|P68372|TBB4B_MOUSE	Tubulin beta-4B chain OS=Mus musculus GN=Tubb4b PE=1 SV=1	2
29	5.18	sp|P99024|TBB5_MOUSE	Tubulin beta-5 chain OS=Mus musculus GN=Tubb5 PE=1 SV=1	2
37	3.587	sp|Q9R0P9|UCHL1_MOUSE	Ubiquitin carboxyl-terminal hydrolase isozyme L1 OS=Mus musculus GN=Uchl1 PE=1 SV=1	1
11	29.61	sp|P20152|VIME_MOUSE	Vimentin OS=Mus musculus GN=Vim PE=1 SV=3	16
