# Supplementary material for: Increased Association of Deamidated αA-N101D with Lens membrane of transgenic αAN101D vs. wild type αA mice: potential effects on intracellular ionic imbalance and membrane disorganization
Source: BMC Ophthalmol. 2020 Dec 10;20:484. doi: 10.1186/s12886-020-01734-0 (PMC7726915; doi:10.1186/s12886-020-01734-0)
Supplement: Supplementary file 2 — Additional file 2: Supplementary Table B. Water Insoluble-Urea Insoluble (WI-UI)-Protein Fraction of AlphaA N101D lens [file 12886_2020_1734_MOESM2_ESM.xlsx]

## Sheet: Om_3_ProteinSummary
N	%Cov(95)	Accession	Water Insoluble-Urea Insoluble (WI-UI)-Protein Fraction of AlphaA N101D Lens	Peptides(95%)		N	%Cov(95)	Accession	Water Insoluble-Urea Insoluble (WI-UI)- Protein Fraction of Wild-Type Alpha A	Peptides(95%)
27	10.4	sp|P60710|ACTB_MOUSE	Actin, cytoplasmic 1 OS=Mus musculus GN=Actb PE=1 SV=1	3		54	5.455	sp|P63325|RS10_MOUSE	40S ribosomal protein S10 OS=Mus musculus GN=Rps10 PE=1 SV=1	1
27	10.4	sp|P63260|ACTG_MOUSE	Actin, cytoplasmic 2 OS=Mus musculus GN=Actg1 PE=1 SV=1	3		50	6.849	sp|P14131|RS16_MOUSE	40S ribosomal protein S16 OS=Mus musculus GN=Rps16 PE=2 SV=4	1
1	79.59	sp|P24622|CRYAA_MOUSE	Alpha-crystallin A chain OS=Mus musculus GN=Cryaa PE=2 SV=1	100		68	2.712	sp|P14206|RSSA_MOUSE	40S ribosomal protein SA OS=Mus musculus GN=Rpsa PE=1 SV=4	1
4	90.86	sp|P23927|CRYAB_MOUSE	Alpha-crystallin B chain OS=Mus musculus GN=Cryab PE=1 SV=2	56		15	38.93	sp|P60710|ACTB_MOUSE	Actin, cytoplasmic 1 OS=Mus musculus GN=Actb PE=1 SV=1	13
26	6.51	sp|Q03265|ATPA_MOUSE	ATP synthase subunit alpha, mitochondrial OS=Mus musculus GN=Atp5a1 PE=1 SV=1	3		15	38.93	sp|P63260|ACTG_MOUSE	Actin, cytoplasmic 2 OS=Mus musculus GN=Actg1 PE=1 SV=1	13
14	18.34	sp|P56480|ATPB_MOUSE	ATP synthase subunit beta, mitochondrial OS=Mus musculus GN=Atp5b PE=1 SV=2	7		48	0.9975	sp|Q8JZQ2|AFG32_MOUSE	AFG3-like protein 2 OS=Mus musculus GN=Afg3l2 PE=1 SV=1	1
16	43.94	sp|P02525|CRBA1_MOUSE	Beta-crystallin A1 OS=Mus musculus GN=Cryba1 PE=2 SV=2	15		1	89.29	sp|P24622|CRYAA_MOUSE	Alpha-crystallin A chain OS=Mus musculus GN=Cryaa PE=2 SV=1	124
17	32.99	sp|Q9JJV1|CRBA2_MOUSE	Beta-crystallin A2 OS=Mus musculus GN=Cryba2 PE=2 SV=3	9		11	66.86	sp|P23927|CRYAB_MOUSE	Alpha-crystallin B chain OS=Mus musculus GN=Cryab PE=1 SV=2	24
10	61.73	sp|Q9JJV0|CRBA4_MOUSE	Beta-crystallin A4 OS=Mus musculus GN=Cryba4 PE=2 SV=3	14		48	0.2052	sp|Q8C8R3|ANK2_MOUSE	Ankyrin-2 OS=Mus musculus GN=Ank2 PE=1 SV=2	1
6	68	sp|Q9WVJ5|CRBB1_MOUSE	Beta-crystallin B1 OS=Mus musculus GN=Crybb1 PE=1 SV=3	19		56	1.351	sp|P98203|ARVC_MOUSE	Armadillo repeat protein deleted in velo-cardio-facial syndrome homolog OS=Mus musculus GN=Arvcf PE=1 SV=2	1
3	85.85	sp|P62696|CRBB2_MOUSE	Beta-crystallin B2 OS=Mus musculus GN=Crybb2 PE=1 SV=2	69		5	77.78	sp|P02525|CRBA1_MOUSE	Beta-crystallin A1 OS=Mus musculus GN=Cryba1 PE=2 SV=2	79
2	80.09	sp|Q9JJU9|CRBB3_MOUSE	Beta-crystallin B3 OS=Mus musculus GN=Crybb3 PE=2 SV=3	57		16	58.88	sp|Q9JJV1|CRBA2_MOUSE	Beta-crystallin A2 OS=Mus musculus GN=Cryba2 PE=2 SV=3	13
19	25.28	sp|O35486|CRBS_MOUSE	Beta-crystallin S OS=Mus musculus GN=Crygs PE=1 SV=3	10		14	74.49	sp|Q9JJV0|CRBA4_MOUSE	Beta-crystallin A4 OS=Mus musculus GN=Cryba4 PE=2 SV=3	33
51	0.9934	sp|P15116|CADH2_MOUSE	Cadherin-2 OS=Mus musculus GN=Cdh2 PE=1 SV=2	1		4	88.8	sp|Q9WVJ5|CRBB1_MOUSE	Beta-crystallin B1 OS=Mus musculus GN=Crybb1 PE=1 SV=3	102
52	2.381	sp|P10126|EF1A1_MOUSE	Elongation factor 1-alpha 1 OS=Mus musculus GN=Eef1a1 PE=1 SV=3	1		13	76.59	sp|P62696|CRBB2_MOUSE	Beta-crystallin B2 OS=Mus musculus GN=Crybb2 PE=1 SV=2	28
52	2.376	sp|P62631|EF1A2_MOUSE	Elongation factor 1-alpha 2 OS=Mus musculus GN=Eef1a2 PE=1 SV=1	1		3	90.52	sp|Q9JJU9|CRBB3_MOUSE	Beta-crystallin B3 OS=Mus musculus GN=Crybb3 PE=2 SV=3	135
42	2.463	sp|P60843|IF4A1_MOUSE	Eukaryotic initiation factor 4A-I OS=Mus musculus GN=Eif4a1 PE=1 SV=1	1		7	88.2	sp|O35486|CRBS_MOUSE	Beta-crystallin S OS=Mus musculus GN=Crygs PE=1 SV=3	36
42	2.457	sp|P10630|IF4A2_MOUSE	Eukaryotic initiation factor 4A-II OS=Mus musculus GN=Eif4a2 PE=2 SV=2	1		21	8.323	sp|Q02248|CTNB1_MOUSE	Catenin beta-1 OS=Mus musculus GN=Ctnnb1 PE=1 SV=1	6
33	2.73	sp|P26040|EZRI_MOUSE	Ezrin OS=Mus musculus GN=Ezr PE=1 SV=3	2		20	15.8	sp|P10126|EF1A1_MOUSE	Elongation factor 1-alpha 1 OS=Mus musculus GN=Eef1a1 PE=1 SV=3	7
21	39.26	sp|Q05816|FABP5_MOUSE	Fatty acid-binding protein, epidermal OS=Mus musculus GN=Fabp5 PE=1 SV=3	7		20	15.77	sp|P62631|EF1A2_MOUSE	Elongation factor 1-alpha 2 OS=Mus musculus GN=Eef1a2 PE=1 SV=1	7
9	14.8	sp|A2AMT1|BFSP1_MOUSE	Filensin OS=Mus musculus GN=Bfsp1 PE=2 SV=1	11		38	2.331	sp|P58252|EF2_MOUSE	Elongation factor 2 OS=Mus musculus GN=Eef2 PE=1 SV=2	2
34	37.36	sp|P04345|CRGA_MOUSE	Gamma-crystallin A OS=Mus musculus GN=Cryga PE=2 SV=2	7		65	2.463	sp|P60843|IF4A1_MOUSE	Eukaryotic initiation factor 4A-I OS=Mus musculus GN=Eif4a1 PE=1 SV=1	1
28	60	sp|P04344|CRGB_MOUSE	Gamma-crystallin B OS=Mus musculus GN=Crygb PE=2 SV=4	17		65	2.457	sp|P10630|IF4A2_MOUSE	Eukaryotic initiation factor 4A-II OS=Mus musculus GN=Eif4a2 PE=2 SV=2	1
13	49.43	sp|Q61597|CRGC_MOUSE	Gamma-crystallin C OS=Mus musculus GN=Crygc PE=1 SV=3	10		36	4.437	sp|P26040|EZRI_MOUSE	Ezrin OS=Mus musculus GN=Ezr PE=1 SV=3	3
5	72.41	sp|Q03740|CRGE_MOUSE	Gamma-crystallin E OS=Mus musculus GN=Cryge PE=2 SV=4	26		17	48.89	sp|Q05816|FABP5_MOUSE	Fatty acid-binding protein, epidermal OS=Mus musculus GN=Fabp5 PE=1 SV=3	9
38	75.29	sp|Q9CXV3|CRGF_MOUSE	Gamma-crystallin F OS=Mus musculus GN=Crygf PE=2 SV=3	25		9	31.39	sp|A2AMT1|BFSP1_MOUSE	Filensin OS=Mus musculus GN=Bfsp1 PE=2 SV=1	19
40	2.558	sp|P03995|GFAP_MOUSE	Glial fibrillary acidic protein OS=Mus musculus GN=Gfap PE=1 SV=4	1		2	97.13	sp|P04345|CRGA_MOUSE	Gamma-crystallin A OS=Mus musculus GN=Cryga PE=2 SV=2	154
36	5.556	sp|Q9D1U0|GRIFN_MOUSE	Grifin OS=Mus musculus GN=Grifin PE=2 SV=1	1		6	92.57	sp|P04344|CRGB_MOUSE	Gamma-crystallin B OS=Mus musculus GN=Crygb PE=2 SV=4	135
43	4.785	sp|P14602|HSPB1_MOUSE	Heat shock protein beta-1 OS=Mus musculus GN=Hspb1 PE=1 SV=3	1		10	87.93	sp|Q61597|CRGC_MOUSE	Gamma-crystallin C OS=Mus musculus GN=Crygc PE=1 SV=3	114
47	0.9669	sp|P11499|HS90B_MOUSE	Heat shock protein HSP 90-beta OS=Mus musculus GN=Hsp90ab1 PE=1 SV=3	1		22	80.46	sp|P04342|CRGD_MOUSE	Gamma-crystallin D OS=Mus musculus GN=Crygd PE=2 SV=3	134
30	8.763	sp|P10922|H10_MOUSE	Histone H1.0 OS=Mus musculus GN=H1f0 PE=2 SV=4	2		60	80.46	sp|Q03740|CRGE_MOUSE	Gamma-crystallin E OS=Mus musculus GN=Cryge PE=2 SV=4	131
29	31.6	sp|P15864|H12_MOUSE	Histone H1.2 OS=Mus musculus GN=Hist1h1c PE=1 SV=2	11		12	81.03	sp|Q9CXV3|CRGF_MOUSE	Gamma-crystallin F OS=Mus musculus GN=Crygf PE=2 SV=3	127
29	21.27	sp|P43277|H13_MOUSE	Histone H1.3 OS=Mus musculus GN=Hist1h1d PE=1 SV=2	10		26	46.99	sp|Q8VHL5|CRGN_MOUSE	Gamma-crystallin N OS=Mus musculus GN=Crygn PE=1 SV=2	7
12	31.51	sp|P43274|H14_MOUSE	Histone H1.4 OS=Mus musculus GN=Hist1h1e PE=1 SV=2	12		27	8.636	sp|P28236|CXA8_MOUSE	Gap junction alpha-8 protein OS=Mus musculus GN=Gja8 PE=1 SV=2	4
18	51.54	sp|P22752|H2A1_MOUSE	Histone H2A type 1 OS=Mus musculus GN=Hist1h2ab PE=1 SV=3	11		34	2.558	sp|P03995|GFAP_MOUSE	Glial fibrillary acidic protein OS=Mus musculus GN=Gfap PE=1 SV=4	1
18	51.54	sp|Q8CGP5|H2A1F_MOUSE	Histone H2A type 1-F OS=Mus musculus GN=Hist1h2af PE=1 SV=3	11		25	28.23	sp|P16858|G3P_MOUSE	Glyceraldehyde-3-phosphate dehydrogenase OS=Mus musculus GN=Gapdh PE=1 SV=2	6
18	52.34	sp|Q8CGP6|H2A1H_MOUSE	Histone H2A type 1-H OS=Mus musculus GN=Hist1h2ah PE=1 SV=3	11		44	10.42	sp|Q9D1U0|GRIFN_MOUSE	Grifin OS=Mus musculus GN=Grifin PE=2 SV=1	1
18	51.54	sp|Q8CGP7|H2A1K_MOUSE	Histone H2A type 1-K OS=Mus musculus GN=Hist1h2ak PE=1 SV=3	11		58	3.107	sp|B2RSH2|GNAI1_MOUSE	Guanine nucleotide-binding protein G(i) subunit alpha-1 OS=Mus musculus GN=Gnai1 PE=2 SV=1	1
37	43.85	sp|Q6GSS7|H2A2A_MOUSE	Histone H2A type 2-A OS=Mus musculus GN=Hist2h2aa1 PE=1 SV=3	8		58	3.099	sp|P08752|GNAI2_MOUSE	Guanine nucleotide-binding protein G(i) subunit alpha-2 OS=Mus musculus GN=Gnai2 PE=1 SV=5	1
37	44.19	sp|Q64523|H2A2C_MOUSE	Histone H2A type 2-C OS=Mus musculus GN=Hist2h2ac PE=1 SV=3	8		58	3.107	sp|Q9DC51|GNAI3_MOUSE	Guanine nucleotide-binding protein G(k) subunit alpha OS=Mus musculus GN=Gnai3 PE=1 SV=3	1
18	51.54	sp|Q8BFU2|H2A3_MOUSE	Histone H2A type 3 OS=Mus musculus GN=Hist3h2a PE=1 SV=3	11		58	3.107	sp|P18872|GNAO_MOUSE	Guanine nucleotide-binding protein G(o) subunit alpha OS=Mus musculus GN=Gnao1 PE=1 SV=3	1
18	51.94	sp|Q8R1M2|H2AJ_MOUSE	Histone H2A.J OS=Mus musculus GN=H2afj PE=1 SV=1	11		58	2.887	sp|Q8CGK7|GNAL_MOUSE	Guanine nucleotide-binding protein G(olf) subunit alpha OS=Mus musculus GN=Gnal PE=1 SV=1	1
18	39.16	sp|P27661|H2AX_MOUSE	Histone H2AX OS=Mus musculus GN=H2afx PE=1 SV=2	9		58	2.792	sp|P63094|GNAS2_MOUSE	Guanine nucleotide-binding protein G(s) subunit alpha isoforms short OS=Mus musculus GN=Gnas PE=1 SV=1	1
31	37.01	sp|P70696|H2B1A_MOUSE	Histone H2B type 1-A OS=Mus musculus GN=Hist1h2ba PE=1 SV=3	12		58	0.9709	sp|Q6R0H7|GNAS1_MOUSE	Guanine nucleotide-binding protein G(s) subunit alpha isoforms XLas OS=Mus musculus GN=Gnas PE=2 SV=1	1
31	37.3	sp|Q64475|H2B1B_MOUSE	Histone H2B type 1-B OS=Mus musculus GN=Hist1h2bb PE=1 SV=3	12		58	3.143	sp|P20612|GNAT1_MOUSE	Guanine nucleotide-binding protein G(t) subunit alpha-1 OS=Mus musculus GN=Gnat1 PE=1 SV=3	1
31	37.3	sp|Q6ZWY9|H2B1C_MOUSE	Histone H2B type 1-C/E/G OS=Mus musculus GN=Hist1h2bc PE=1 SV=3	12		58	3.107	sp|P50149|GNAT2_MOUSE	Guanine nucleotide-binding protein G(t) subunit alpha-2 OS=Mus musculus GN=Gnat2 PE=2 SV=2	1
31	37.3	sp|P10853|H2B1F_MOUSE	Histone H2B type 1-F/J/L OS=Mus musculus GN=Hist1h2bf PE=1 SV=2	12		58	3.107	sp|Q3V3I2|GNAT3_MOUSE	Guanine nucleotide-binding protein G(t) subunit alpha-3 OS=Mus musculus GN=Gnat3 PE=1 SV=2	1
31	37.3	sp|Q64478|H2B1H_MOUSE	Histone H2B type 1-H OS=Mus musculus GN=Hist1h2bh PE=1 SV=3	12		58	2.902	sp|P27600|GNA12_MOUSE	Guanine nucleotide-binding protein subunit alpha-12 OS=Mus musculus GN=Gna12 PE=1 SV=3	1
31	33.33	sp|Q8CGP1|H2B1K_MOUSE	Histone H2B type 1-K OS=Mus musculus GN=Hist1h2bk PE=1 SV=3	11		58	2.918	sp|P27601|GNA13_MOUSE	Guanine nucleotide-binding protein subunit alpha-13 OS=Mus musculus GN=Gna13 PE=1 SV=1	1
31	37.3	sp|P10854|H2B1M_MOUSE	Histone H2B type 1-M OS=Mus musculus GN=Hist1h2bm PE=1 SV=2	12		35	2.028	sp|Q61696|HS71A_MOUSE	Heat shock 70 kDa protein 1A OS=Mus musculus GN=Hspa1a PE=1 SV=2	1
31	37.3	sp|Q8CGP2|H2B1P_MOUSE	Histone H2B type 1-P OS=Mus musculus GN=Hist1h2bp PE=1 SV=3	12		35	2.025	sp|P17879|HS71B_MOUSE	Heat shock 70 kDa protein 1B OS=Mus musculus GN=Hspa1b PE=1 SV=3
31	37.3	sp|Q64525|H2B2B_MOUSE	Histone H2B type 2-B OS=Mus musculus GN=Hist2h2bb PE=1 SV=3	12		35	2.028	sp|P16627|HS71L_MOUSE	Heat shock 70 kDa protein 1-like OS=Mus musculus GN=Hspa1l PE=2 SV=4	1
31	28.57	sp|Q64524|H2B2E_MOUSE	Histone H2B type 2-E OS=Mus musculus GN=Hist2h2be PE=1 SV=3	10		35	6.502	sp|P63017|HSP7C_MOUSE	Heat shock cognate 71 kDa protein OS=Mus musculus GN=Hspa8 PE=1 SV=1	3
31	32.54	sp|Q9D2U9|H2B3A_MOUSE	Histone H2B type 3-A OS=Mus musculus GN=Hist3h2ba PE=1 SV=3	11		57	4.785	sp|P14602|HSPB1_MOUSE	Heat shock protein beta-1 OS=Mus musculus GN=Hspb1 PE=1 SV=3	1
31	32.54	sp|Q8CGP0|H2B3B_MOUSE	Histone H2B type 3-B OS=Mus musculus GN=Hist3h2bb PE=1 SV=3	11		64	4.366	sp|P07901|HS90A_MOUSE	Heat shock protein HSP 90-alpha OS=Mus musculus GN=Hsp90aa1 PE=1 SV=4	3
22	32.35	sp|P68433|H31_MOUSE	Histone H3.1 OS=Mus musculus GN=Hist1h3a PE=1 SV=2	13		32	7.044	sp|P11499|HS90B_MOUSE	Heat shock protein HSP 90-beta OS=Mus musculus GN=Hsp90ab1 PE=1 SV=3	4
22	32.35	sp|P84228|H32_MOUSE	Histone H3.2 OS=Mus musculus GN=Hist1h3b PE=1 SV=2	13		35	6.635	sp|P17156|HSP72_MOUSE	Heat shock-related 70 kDa protein 2 OS=Mus musculus GN=Hspa2 PE=1 SV=2	3
22	32.35	sp|P84244|H33_MOUSE	Histone H3.3 OS=Mus musculus GN=H3f3a PE=1 SV=2	13		37	11.03	sp|P68433|H31_MOUSE	Histone H3.1 OS=Mus musculus GN=Hist1h3a PE=1 SV=2	2
22	32.35	sp|P02301|H3C_MOUSE	Histone H3.3C OS=Mus musculus GN=H3f3c PE=3 SV=3	13		37	11.03	sp|P84228|H32_MOUSE	Histone H3.2 OS=Mus musculus GN=Hist1h3b PE=1 SV=2	2
11	56.31	sp|P62806|H4_MOUSE	Histone H4 OS=Mus musculus GN=Hist1h4a PE=1 SV=2	19		37	11.03	sp|P84244|H33_MOUSE	Histone H3.3 OS=Mus musculus GN=H3f3a PE=1 SV=2	2
24	17.19	sp|P02535|K1C10_MOUSE	Keratin, type I cytoskeletal 10 OS=Mus musculus GN=Krt10 PE=1 SV=3	11		37	11.03	sp|P02301|H3C_MOUSE	Histone H3.3C OS=Mus musculus GN=H3f3c PE=3 SV=3	2
15	9.956	sp|Q61414|K1C15_MOUSE	Keratin, type I cytoskeletal 15 OS=Mus musculus GN=Krt15 PE=1 SV=2	6		39	11.65	sp|P62806|H4_MOUSE	Histone H4 OS=Mus musculus GN=Hist1h4a PE=1 SV=2	1
15	8.314	sp|Q9QWL7|K1C17_MOUSE	Keratin, type I cytoskeletal 17 OS=Mus musculus GN=Krt17 PE=1 SV=3	5		52	1.003	sp|Q8BKC5|IPO5_MOUSE	Importin-5 OS=Mus musculus GN=Ipo5 PE=1 SV=3	1
32	11.06	sp|Q6IFX2|K1C42_MOUSE	Keratin, type I cytoskeletal 42 OS=Mus musculus GN=Krt42 PE=1 SV=1	5		28	10.7	sp|P02535|K1C10_MOUSE	Keratin, type I cytoskeletal 10 OS=Mus musculus GN=Krt10 PE=1 SV=3	6
40	2.17	sp|Q9Z2T6|KRT85_MOUSE	Keratin, type II cuticular Hb5 OS=Mus musculus GN=Krt85 PE=2 SV=2	1		31	5.492	sp|P08730|K1C13_MOUSE	Keratin, type I cytoskeletal 13 OS=Mus musculus GN=Krt13 PE=1 SV=2	4
20	9.105	sp|P04104|K2C1_MOUSE	Keratin, type II cytoskeletal 1 OS=Mus musculus GN=Krt1 PE=1 SV=4	13		31	7.301	sp|Q61414|K1C15_MOUSE	Keratin, type I cytoskeletal 15 OS=Mus musculus GN=Krt15 PE=1 SV=2	5
45	9.441	sp|Q6IFZ6|K2C1B_MOUSE	Keratin, type II cytoskeletal 1b OS=Mus musculus GN=Krt77 PE=1 SV=1	6		31	7.621	sp|Q9QWL7|K1C17_MOUSE	Keratin, type I cytoskeletal 17 OS=Mus musculus GN=Krt17 PE=1 SV=3	5
48	6.223	sp|Q3TTY5|K22E_MOUSE	Keratin, type II cytoskeletal 2 epidermal OS=Mus musculus GN=Krt2 PE=1 SV=1	4		31	8.189	sp|P19001|K1C19_MOUSE	Keratin, type I cytoskeletal 19 OS=Mus musculus GN=Krt19 PE=1 SV=1	5
41	3.535	sp|Q3UV17|K22O_MOUSE	Keratin, type II cytoskeletal 2 oral OS=Mus musculus GN=Krt76 PE=2 SV=1	2		40	7.965	sp|Q6IFX2|K1C42_MOUSE	Keratin, type I cytoskeletal 42 OS=Mus musculus GN=Krt42 PE=1 SV=1	4
23	5.517	sp|Q922U2|K2C5_MOUSE	Keratin, type II cytoskeletal 5 OS=Mus musculus GN=Krt5 PE=1 SV=1	4		34	2.17	sp|Q9Z2T6|KRT85_MOUSE	Keratin, type II cuticular Hb5 OS=Mus musculus GN=Krt85 PE=2 SV=2	1
35	12.48	sp|P50446|K2C6A_MOUSE	Keratin, type II cytoskeletal 6A OS=Mus musculus GN=Krt6a PE=1 SV=3	7		18	7.535	sp|P04104|K2C1_MOUSE	Keratin, type II cytoskeletal 1 OS=Mus musculus GN=Krt1 PE=1 SV=4	11
40	2.407	sp|Q9DCV7|K2C7_MOUSE	Keratin, type II cytoskeletal 7 OS=Mus musculus GN=Krt7 PE=1 SV=1	1		61	5.42	sp|Q6IFZ6|K2C1B_MOUSE	Keratin, type II cytoskeletal 1b OS=Mus musculus GN=Krt77 PE=1 SV=1	3
40	6.865	sp|Q6NXH9|K2C73_MOUSE	Keratin, type II cytoskeletal 73 OS=Mus musculus GN=Krt73 PE=1 SV=1	4		41	6.566	sp|Q3UV17|K22O_MOUSE	Keratin, type II cytoskeletal 2 oral OS=Mus musculus GN=Krt76 PE=2 SV=1	4
39	4.143	sp|Q8VED5|K2C79_MOUSE	Keratin, type II cytoskeletal 79 OS=Mus musculus GN=Krt79 PE=2 SV=2	2		30	6.897	sp|Q922U2|K2C5_MOUSE	Keratin, type II cytoskeletal 5 OS=Mus musculus GN=Krt5 PE=1 SV=1	4
25	12.17	sp|P51180|MIP_MOUSE	Lens fiber major intrinsic protein OS=Mus musculus GN=Mip PE=1 SV=2	3		34	3.939	sp|Q9DCV7|K2C7_MOUSE	Keratin, type II cytoskeletal 7 OS=Mus musculus GN=Krt7 PE=1 SV=1	2
46	6.936	sp|P56563|LMIP_MOUSE	Lens fiber membrane intrinsic protein OS=Mus musculus GN=Lim2 PE=1 SV=2	1		34	4.962	sp|Q9R0H5|K2C71_MOUSE	Keratin, type II cytoskeletal 71 OS=Mus musculus GN=Krt71 PE=1 SV=1	4
33	2.773	sp|P26041|MOES_MOUSE	Moesin OS=Mus musculus GN=Msn PE=1 SV=3	2		34	2.692	sp|Q6IME9|K2C72_MOUSE	Keratin, type II cytoskeletal 72 OS=Mus musculus GN=Krt72 PE=3 SV=1	3
44	1.379	sp|Q8C3P7|MTA70_MOUSE	N6-adenosine-methyltransferase subunit METTL3 OS=Mus musculus GN=Mettl3 PE=1 SV=2	1		34	6.865	sp|Q6NXH9|K2C73_MOUSE	Keratin, type II cytoskeletal 73 OS=Mus musculus GN=Krt73 PE=1 SV=1	5
7	28.61	sp|Q6NVD9|BFSP2_MOUSE	Phakinin OS=Mus musculus GN=Bfsp2 PE=1 SV=1	12		47	3.578	sp|Q8VED5|K2C79_MOUSE	Keratin, type II cytoskeletal 79 OS=Mus musculus GN=Krt79 PE=2 SV=2	2
33	2.744	sp|P26043|RADI_MOUSE	Radixin OS=Mus musculus GN=Rdx PE=1 SV=3	2		43	16.39	sp|Q9WVB6|LENEP_MOUSE	Lens epithelial cell protein LEP503 OS=Mus musculus GN=Lenep PE=4 SV=1	1
50	0.3641	sp|P16546|SPTN1_MOUSE	Spectrin alpha chain, non-erythrocytic 1 OS=Mus musculus GN=Sptan1 PE=1 SV=4	1		23	14.83	sp|P51180|MIP_MOUSE	Lens fiber major intrinsic protein OS=Mus musculus GN=Mip PE=1 SV=2	7
8	25.97	sp|P20152|VIME_MOUSE	Vimentin OS=Mus musculus GN=Vim PE=1 SV=3	12		45	6.936	sp|P56563|LMIP_MOUSE	Lens fiber membrane intrinsic protein OS=Mus musculus GN=Lim2 PE=1 SV=2	1
						36	4.506	sp|P26041|MOES_MOUSE	Moesin OS=Mus musculus GN=Msn PE=1 SV=3	3
						49	2.588	sp|Q9DCL9|PUR6_MOUSE	Multifunctional protein ADE2 OS=Mus musculus GN=Paics PE=1 SV=4	1
						66	4.04	sp|Q61171|PRDX2_MOUSE	Peroxiredoxin-2 OS=Mus musculus GN=Prdx2 PE=1 SV=3	1
						8	43.03	sp|Q6NVD9|BFSP2_MOUSE	Phakinin OS=Mus musculus GN=Bfsp2 PE=1 SV=1	17
						51	4.077	sp|P09411|PGK1_MOUSE	Phosphoglycerate kinase 1 OS=Mus musculus GN=Pgk1 PE=1 SV=4	1
						24	13.75	sp|P52480|KPYM_MOUSE	Pyruvate kinase PKM OS=Mus musculus GN=Pkm PE=1 SV=4	6
						46	2.472	sp|Q61598|GDIB_MOUSE	Rab GDP dissociation inhibitor beta OS=Mus musculus GN=Gdi2 PE=1 SV=1	1
						36	4.46	sp|P26043|RADI_MOUSE	Radixin OS=Mus musculus GN=Rdx PE=1 SV=3	3
						52	0.9955	sp|Q8BIV3|RNBP6_MOUSE	Ras-related C3 botulinum toxin substrate 1 OS=Mus musculus GN=Rac1 PE=1 SV=1	1
						33	12.5	sp|P63001|RAC1_MOUSE	Ras-related C3 botulinum toxin substrate 2 OS=Mus musculus GN=Rac2 PE=2 SV=1	2
						33	5.208	sp|Q05144|RAC2_MOUSE	Ras-related C3 botulinum toxin substrate 3 OS=Mus musculus GN=Rac3 PE=1 SV=1	1
						33	5.208	sp|P60764|RAC3_MOUSE	Ran-binding protein 6 OS=Mus musculus GN=Ranbp6 PE=2 SV=3	1
						67	2.595	sp|P24549|AL1A1_MOUSE	Retinal dehydrogenase 1 OS=Mus musculus GN=Aldh1a1 PE=1 SV=5	1
						62	0.445	sp|P16546|SPTN1_MOUSE	Spectrin alpha chain, non-erythrocytic 1 OS=Mus musculus GN=Sptan1 PE=1 SV=4	1
						59	0.3809	sp|Q62261|SPTB2_MOUSE	Spectrin beta chain, non-erythrocytic 1 OS=Mus musculus GN=Sptbn1 PE=1 SV=2	1
						19	17.29	sp|P68369|TBA1A_MOUSE	Tubulin alpha-1A chain OS=Mus musculus GN=Tuba1a PE=1 SV=1	7
						19	14.25	sp|P68373|TBA1C_MOUSE	Tubulin alpha-1C chain OS=Mus musculus GN=Tuba1c PE=1 SV=1	6
						29	9.663	sp|Q7TMM9|TBB2A_MOUSE	Tubulin beta-2A chain OS=Mus musculus GN=Tubb2a PE=1 SV=1	4
						63	9.663	sp|Q7TMM9|TBB2A_MOUSE	Tubulin beta-2A chain OS=Mus musculus GN=Tubb2a PE=1 SV=1	4
						63	9.663	sp|Q9CWF2|TBB2B_MOUSE	Tubulin beta-2B chain OS=Mus musculus GN=Tubb2b PE=1 SV=1	4
						29	9.685	sp|Q9D6F9|TBB4A_MOUSE	Tubulin beta-4A chain OS=Mus musculus GN=Tubb4a PE=1 SV=3	5
						29	9.663	sp|P68372|TBB4B_MOUSE	Tubulin beta-4B chain OS=Mus musculus GN=Tubb4b PE=1 SV=1	5
						29	9.685	sp|P99024|TBB5_MOUSE	Tubulin beta-5 chain OS=Mus musculus GN=Tubb5 PE=1 SV=1	5
						42	3.587	sp|Q9R0P9|UCHL1_MOUSE	Ubiquitin carboxyl-terminal hydrolase isozyme L1 OS=Mus musculus GN=Uchl1 PE=1 SV=1	1
						53	3.004	sp|P20152|VIME_MOUSE	Vimentin OS=Mus musculus GN=Vim PE=1 SV=3	1
