# Supplementary material for: Increased Association of Deamidated αA-N101D with Lens membrane of transgenic αAN101D vs. wild type αA mice: potential effects on intracellular ionic imbalance and membrane disorganization
Source: BMC Ophthalmol. 2020 Dec 10;20:484. doi: 10.1186/s12886-020-01734-0 (PMC7726915; doi:10.1186/s12886-020-01734-0)
Supplement: Supplementary file 3 — Additional file 3: Supplementary Table C. Water insoluble-urea soluble alphaAN101D (Mr > 30 kDa) [file 12886_2020_1734_MOESM3_ESM.xlsx]

## Sheet: A_ProteinSummary
N	%Cov(95)	Accession	Water insoluble-urea soluble alphaAN101D, >30 kDa	Peptides(95%)		N	%Cov(95)	Accession	Water insoulbe-urea soluble -wild type >30 kDa	Peptides(95%)
9	19.9	sp|P24622|CRYAA_MOUSE	Alpha-crystallin A chain OS=Mus musculus GN=Cryaa PE=2 SV=1	4		18	1.379	sp|Q8C3P7|MTA70_MOUSE	N6-adenosine-methyltransferase subunit METTL3 OS=Mus musculus GN=Mettl3 PE=1 SV=2	1
22	0.8351	sp|Q7SIG6|ASAP2_MOUSE	Arf-GAP with SH3 domain, ANK repeat and PH domain-containing protein 2 OS=Mus musculus GN=Asap2 PE=1 SV=3	1		5	16.67	sp|P04345|CRGA_MOUSE	Gamma-crystallin A OS=Mus musculus GN=Cryga PE=2 SV=2	7
12	0.4856	sp|Q05793|PGBM_MOUSE	Basement membrane-specific heparan sulfate proteoglycan core protein OS=Mus musculus GN=Hspg2 PE=1 SV=1	3		6	19.54	sp|Q61597|CRGC_MOUSE	Gamma-crystallin C OS=Mus musculus GN=Crygc PE=1 SV=3	8
3	28	sp|Q9WVJ5|CRBB1_MOUSE	Beta-crystallin B1 OS=Mus musculus GN=Crybb1 PE=1 SV=3	10		9	18.25	sp|P51180|MIP_MOUSE	Lens fiber major intrinsic protein OS=Mus musculus GN=Mip PE=1 SV=2	6
14	4.739	sp|Q9JJU9|CRBB3_MOUSE	Beta-crystallin B3 OS=Mus musculus GN=Crybb3 PE=2 SV=3	1		10	17.6	sp|Q9WVJ5|CRBB1_MOUSE	Beta-crystallin B1 OS=Mus musculus GN=Crybb1 PE=1 SV=3	5
23	1.62	sp|Q8CD10|MICU2_MOUSE	Calcium uptake protein 2, mitochondrial OS=Mus musculus GN=Micu2 PE=1 SV=2	1		12	15.82	sp|P24622|CRYAA_MOUSE	Alpha-crystallin A chain OS=Mus musculus GN=Cryaa PE=2 SV=1	3
10	4.314	sp|P02463|CO4A1_MOUSE	Collagen alpha-1(IV) chain OS=Mus musculus GN=Col4a1 PE=2 SV=4	8		15	10.92	sp|Q9CXV3|CRGF_MOUSE	Gamma-crystallin F OS=Mus musculus GN=Crygf PE=2 SV=3	7
4	4.745	sp|P08122|CO4A2_MOUSE	Collagen alpha-2(IV) chain OS=Mus musculus GN=Col4a2 PE=2 SV=4	9		15	10.92	sp|Q03740|CRGE_MOUSE	Gamma-crystallin E OS=Mus musculus GN=Cryge PE=2 SV=4	7
11	14.94	sp|P04345|CRGA_MOUSE	Gamma-crystallin A OS=Mus musculus GN=Cryga PE=2 SV=2	3		15	10.92	sp|P04342|CRGD_MOUSE	Gamma-crystallin D OS=Mus musculus GN=Crygd PE=2 SV=3	7
7	25.71	sp|P04344|CRGB_MOUSE	Gamma-crystallin B OS=Mus musculus GN=Crygb PE=2 SV=4	7		15	15.43	sp|P04344|CRGB_MOUSE	Gamma-crystallin B OS=Mus musculus GN=Crygb PE=2 SV=4	10
8	19.54	sp|Q61597|CRGC_MOUSE	Gamma-crystallin C OS=Mus musculus GN=Crygc PE=1 SV=3	4		19	0.8351	sp|Q7SIG6|ASAP2_MOUSE	Arf-GAP with SH3 domain, ANK repeat and PH domain-containing protein 2 OS=Mus musculus GN=Asap2 PE=1 SV=3	1
15	4.186	sp|P03995|GFAP_MOUSE	Glial fibrillary acidic protein OS=Mus musculus GN=Gfap PE=1 SV=4	2
19	9.125	sp|P51180|MIP_MOUSE	Lens fiber major intrinsic protein OS=Mus musculus GN=Mip PE=1 SV=2	4
21	0.4828	sp|Q6P5H2|NEST_MOUSE	Nestin OS=Mus musculus GN=Nes PE=1 SV=1	1
