# Supplementary material for: Increased Association of Deamidated αA-N101D with Lens membrane of transgenic αAN101D vs. wild type αA mice: potential effects on intracellular ionic imbalance and membrane disorganization
Source: BMC Ophthalmol. 2020 Dec 10;20:484. doi: 10.1186/s12886-020-01734-0 (PMC7726915; doi:10.1186/s12886-020-01734-0)
Supplement: Supplementary file 4 — Additional file 4: Supplementary Table D. Water insoluble-urea insoluble alpha A N101D (Mr > 30 kDa) [file 12886_2020_1734_MOESM4_ESM.xlsx]

## Sheet: C_ProteinSummary
N	%Cov(95)	Accession	Water insoluble-urea insoluble alpha A N101D (>30 kDa species)	Peptides(95%)		N	%Cov(95)	Accession	Water insoluble-ure insoluble wild type (>30 kDa species)	Peptides(95%)
8	10.2	sp|P24622|CRYAA_MOUSE	Alpha-crystallin A chain OS=Mus musculus GN=Cryaa PE=2 SV=1	2		9	4.592	sp|P24622|CRYAA_MOUSE	Alpha-crystallin A chain OS=Mus musculus GN=Cryaa PE=2 SV=1	1
13	5.714	sp|P04344|CRGB_MOUSE	Gamma-crystallin B OS=Mus musculus GN=Crygb PE=2 SV=4	1		5	5.747	sp|Q9CXV3|CRGF_MOUSE	Gamma-crystallin F OS=Mus musculus GN=Crygf PE=2 SV=3	1
13	5.747	sp|P04342|CRGD_MOUSE	Gamma-crystallin D OS=Mus musculus GN=Crygd PE=2 SV=3	1		8	3.422	sp|P51180|MIP_MOUSE	Lens fiber major intrinsic protein OS=Mus musculus GN=Mip PE=1 SV=2	1
13	5.747	sp|Q03740|CRGE_MOUSE	Gamma-crystallin E OS=Mus musculus GN=Cryge PE=2 SV=4	1		7	0.296	sp|Q8BTI8|SRRM2_MOUSE	Serine/arginine repetitive matrix protein 2 OS=Mus musculus GN=Srrm2 PE=1 SV=3	1
13	5.747	sp|Q9CXV3|CRGF_MOUSE	Gamma-crystallin F OS=Mus musculus GN=Crygf PE=2 SV=3	1
10	6.084	sp|P51180|MIP_MOUSE	Lens fiber major intrinsic protein OS=Mus musculus GN=Mip PE=1 SV=2	3
14	1.379	sp|Q8C3P7|MTA70_MOUSE	N6-adenosine-methyltransferase subunit METTL3 OS=Mus musculus GN=Mettl3 PE=1 SV=2	1
17	0.4828	sp|Q6P5H2|NEST_MOUSE	Nestin OS=Mus musculus GN=Nes PE=1 SV=1	1
15	4.598	sp|Q8K0D7|WRB_MOUSE	Tail-anchored protein insertion receptor WRB OS=Mus musculus GN=Wrb PE=2 SV=1	1
